# Supplementary material for: Evaluation of All-Cause and Cause-Specific Mortality by Race and Ethnicity Among Pregnant and Recently Pregnant Women in the US, 2019 to 2020
Source: PubMed Central journal article supplement (PMC10193819; doi:10.1001/jamanetworkopen.2022.53280), 2023-01-03
Supplement: NIHMS1882522-supplement-Supplement1.pdf [file NIHMS1882522-supplement-Supplement1.pdf]

## Supplementary Online Content

Howard JT, Perrotte JK, Leong C, Grigsby TJ, Howard KJ. Evaluation of all-cause and cause-specific mortality by race and ethnicity among pregnant and recently pregnant women in the US, 2019 to 2020. *JAMA Netw Open*. 2023;6(1):e2253280. doi:10.1001/jamanetworkopen.2022.53280

**eTable.** *International Statistical Classification of Diseases, Tenth Revision* Codes and Manner of Death to Determine Each Cause of Death

This supplementary material has been provided by the authors to give readers additional information about their work.

**eTable.** *International Statistical Classification of Diseases, Tenth Revision Codes and Manner of Death to Determine Each Cause of Death*

| <b>Cause or Manner of Death</b> | <b>ICD-10 Codes or Manner of Death</b>                                                                                                                                                |
|---------------------------------|---------------------------------------------------------------------------------------------------------------------------------------------------------------------------------------|
| Pregnancy-Associated            | Determined by ICD-10 codes: O00-O99                                                                                                                                                   |
| Non-Pregnancy                   | Determined by ICD-10 codes: All codes except O00-O99                                                                                                                                  |
| Drug Poisoning                  | Determined by ICD-10 codes: X40-X44                                                                                                                                                   |
| Motor Vehicle Accidents         | Determined by ICD-10 codes: V02-V04, V09.0, V09.2, V12-V14, V19.0-V19.2, V19.4-V19.6, V20-V79, V80.3-V80.5, V81.0-V81.1, V82.0-V82.1, V83-V86, V87.0-V87.8, V88.0-V88.8, V89.0, V89.2 |
| Homicide                        | Determined by manner of death: Homicide                                                                                                                                               |
| Suicide                         | Determined by manner of death: Suicide                                                                                                                                                |
